# Supplementary material for: Sometimes less is more: avidity-dependent transport of targeted polymersomes across the blood–brain-barrier
Source: Royal Society of Chemistry journal article supplement (doi:10.1039/d4pm00338a), 2025-01-01
Supplement: d4pm00338a2.pdf [file d4pm00338a2.pdf]

Supplementary Information (SI) for RSC Pharmaceuticals.  
This journal is © The Royal Society of Chemistry 2025

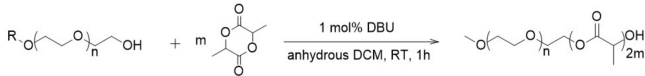

$R = -CH_3$  methoxy-PEG

$R = -CH_2-CH_2-N_3$  azide-PEG
